# Supplementary material
Source: Research Square preprint supplement (doi:10.21203/rs.3.rs-10030405/v1)
Supplement: Supplementary file 1 [file a095f522abf9c6c23f1e47a1.xlsx]

## Sheet: Sheet1
Table S2. Item-level response distributions before and after the case-based session.
Item	Group	Time	A n (%)	B n (%)	C n (%)	D n (%)	E n (%)
General perception
G1	International	Pre	0 (0)	1 (6.3)	4 (25.0)	7 (43.8)	4 (25.0)
		Post	0 (0)	0 (0)	2 (12.5)	6 (37.5)	8 (50.0)
	Local	Pre	1 (6.3)	1 (6.3)	6 (37.5)	6 (37.5)	2 (12.5)
		Post	0 (0)	0 (0)	2 (12.5)	7 (43.8)	7 (43.8)
Dimension 1: Interpretive Authority
IA1	International	Pre	1 (6.3)	1 (6.3)	5 (31.3)	6 (37.5)	3 (18.8)
		Post	0 (0)	1 (6.3)	2 (12.5)	7 (43.8)	6 (37.5)
	Local	Pre	3 (18.8)	2 (12.5)	6 (37.5)	4 (25.0)	1 (6.3)
		Post	1 (6.3)	1 (6.3)	4 (25.0)	7 (43.8)	3 (18.8)
IA2	International	Pre	0 (0)	1 (6.3)	2 (12.5)	5 (31.3)	7 (43.8)
		Post	1 (6.3)	1 (6.3)	3 (18.8)	6 (37.5)	5 (31.3)
	Local	Pre	0 (0)	0 (0)	1 (6.3)	7 (43.8)	8 (50.0)
		Post	1 (6.3)	0 (0)	3 (18.8)	7 (43.8)	5 (31.3)
IA3	International	Pre	0 (0)	1 (6.3)	3 (18.8)	7 (43.8)	5 (31.3)
		Post	0 (0)	0 (0)	2 (12.5)	6 (37.5)	8 (50.0)
	Local	Pre	1 (6.3)	1 (6.3)	5 (31.3)	6 (37.5)	3 (18.8)
		Post	0 (0)	0 (0)	2 (12.5)	7 (43.8)	7 (43.8)
IA4	International	Pre	1 (6.3)	2 (12.5)	6 (37.5)	5 (31.3)	2 (12.5)
		Post	0 (0)	1 (6.3)	3 (18.8)	7 (43.8)	5 (31.3)
	Local	Pre	3 (18.8)	2 (12.5)	6 (37.5)	4 (25.0)	1 (6.3)
		Post	1 (6.3)	1 (6.3)	3 (18.8)	7 (43.8)	4 (25.0)
Dimension 2: Responsibility
R1	International	Pre	0 (0)	1 (6.3)	2 (12.5)	7 (43.8)	6 (37.5)
		Post	0 (0)	1 (6.3)	3 (18.8)	6 (37.5)	6 (37.5)
	Local	Pre	0 (0)	0 (0)	1 (6.3)	6 (37.5)	9 (56.3)
		Post	0 (0)	0 (0)	2 (12.5)	7 (43.8)	7 (43.8)
R2	International	Pre	1 (6.3)	2 (12.5)	7 (43.8)	4 (25.0)	2 (12.5)
		Post	0 (0)	1 (6.3)	3 (18.8)	7 (43.8)	5 (31.3)
	Local	Pre	3 (18.8)	3 (18.8)	6 (37.5)	3 (18.8)	1 (6.3)
		Post	1 (6.3)	1 (6.3)	3 (18.8)	7 (43.8)	4 (25.0)
R3	International	Pre	0 (0)	1 (6.3)	2 (12.5)	6 (37.5)	7 (43.8)
		Post	0 (0)	1 (6.3)	3 (18.8)	6 (37.5)	6 (37.5)
	Local	Pre	0 (0)	0 (0)	1 (6.3)	5 (31.3)	10 (62.5)
		Post	0 (0)	0 (0)	2 (12.5)	7 (43.8)	7 (43.8)
R4	International	Pre	1 (6.3)	1 (6.3)	6 (37.5)	6 (37.5)	2 (12.5)
		Post	0 (0)	1 (6.3)	3 (18.8)	7 (43.8)	5 (31.3)
	Local	Pre	1 (6.3)	1 (6.3)	5 (31.3)	6 (37.5)	3 (18.8)
		Post	1 (6.3)	1 (6.3)	3 (18.8)	7 (43.8)	5 (31.3)
Dimension 3: Uncertainty Communication
U1	International	Pre	1 (6.3)	2 (12.5)	6 (37.5)	5 (31.3)	2 (12.5)
		Post	0 (0)	1 (6.3)	2 (12.5)	7 (43.8)	6 (37.5)
	Local	Pre	3 (18.8)	2 (12.5)	6 (37.5)	4 (25.0)	1 (6.3)
		Post	1 (6.3)	0 (0)	3 (18.8)	7 (43.8)	5 (31.3)
U2	International	Pre	0 (0)	1 (6.3)	2 (12.5)	7 (43.8)	6 (37.5)
		Post	0 (0)	0 (0)	1 (6.3)	5 (31.3)	10 (62.5)
	Local	Pre	0 (0)	0 (0)	2 (12.5)	6 (37.5)	8 (50.0)
		Post	0 (0)	0 (0)	1 (6.3)	6 (37.5)	9 (56.3)
U3	International	Pre	0 (0)	1 (6.3)	3 (18.8)	7 (43.8)	5 (31.3)
		Post	0 (0)	0 (0)	2 (12.5)	6 (37.5)	8 (50.0)
	Local	Pre	1 (6.3)	0 (0)	5 (31.3)	6 (37.5)	4 (25.0)
		Post	0 (0)	0 (0)	2 (12.5)	7 (43.8)	7 (43.8)
U4	International	Pre	0 (0)	1 (6.3)	2 (12.5)	8 (50.0)	5 (31.3)
		Post	0 (0)	0 (0)	1 (6.3)	6 (37.5)	9 (56.3)
	Local	Pre	1 (6.3)	0 (0)	3 (18.8)	7 (43.8)	5 (31.3)
		Post	0 (0)	0 (0)	1 (6.3)	7 (43.8)	8 (50.0)
