# Supplementary material
Source: Research Square preprint supplement (doi:10.21203/rs.3.rs-10030405/v1)
Supplement: Supplementary file 2 [file ec73eb8c9e5958257eb0ff03.docx]

**Table S1. Questionnaire items and open-ended questions.**

**Time point**

**☐ Before session ☐ After session**

**Instructions**

This questionnaire is designed to explore perceptions of ethical challenges associated with AI-mediated clinical communication.

The questionnaire focuses on three dimensions of AI-mediated clinical communication:

- Interpretive authority
- Responsibility
- Uncertainty communication

Please indicate your level of agreement with each statement using the scale provided by selecting one option (A–E) for each item.

You will be asked to complete this questionnaire before and after the session. Please answer each time based on your current understanding.

There are no correct or incorrect answers. We are interested in your perspectives.

All responses are confidential and will be used for research purposes only.

**General Perception**

**G1**

**AI is changing how healthcare professionals communicate with patients in clinical practice.**

A. Strongly disagree

B. Disagree

C. Neutral

D. Agree

E. Strongly agree

**Dimension 1: Interpretive Authority**

**IA1**

**I believe patients may trust AI-generated medical explanations more than explanations from healthcare professionals.**

A. Strongly disagree

B. Disagree

C. Neutral

D. Agree

E. Strongly agree

**IA2**

**Healthcare professionals should remain a primary authority in explaining medical information, even when AI tools are available.**

A. Strongly disagree

B. Disagree

C. Neutral

D. Agree

E. Strongly agree

**IA3**

**AI tools can influence how patients understand their medical condition before speaking with healthcare professionals.**

A. Strongly disagree

B. Disagree

C. Neutral

D. Agree

E. Strongly agree

**IA4**

**It is sometimes difficult for healthcare professionals to correct patient understanding influenced by AI-generated explanations.**

A. Strongly disagree

B. Disagree

C. Neutral

D. Agree

E. Strongly agree

**Dimension 2: Responsibility**

**R1**

**Healthcare professionals are responsible for correcting misunderstandings caused by AI-generated medical explanations.**

A. Strongly disagree

B. Disagree

C. Neutral

D. Agree

E. Strongly agree

**R2**

**When patients rely on AI-generated explanations, responsibility for misunderstanding is unclear.**

A. Strongly disagree

B. Disagree

C. Neutral

D. Agree

E. Strongly agree

**R3**

**Healthcare professionals should take responsibility for ensuring that patients correctly understand medical information, regardless of AI use.**

A. Strongly disagree

B. Disagree

C. Neutral

D. Agree

E. Strongly agree

**R4**

**Healthcare professionals should remain accountable for how AI-generated explanations influence patient understanding.**

A. Strongly disagree

B. Disagree

C. Neutral

D. Agree

E. Strongly agree

**Dimension 3: Uncertainty Communication**

**U1**

**AI-generated explanations may make medical information seem more certain than it actually is.**

A. Strongly disagree

B. Disagree

C. Neutral

D. Agree

E. Strongly agree

**U2**

**It is important for healthcare professionals to explain uncertainty even when AI provides clear answers.**

A. Strongly disagree

B. Disagree

C. Neutral

D. Agree

E. Strongly agree

**U3**

**Healthcare professionals need specific skills to explain uncertain or probabilistic medical information to patients.**

A. Strongly disagree

B. Disagree

C. Neutral

D. Agree

E. Strongly agree

**U4**

**Patients may misunderstand medical risks if uncertainty is not clearly communicated.**

A. Strongly disagree

B. Disagree

C. Neutral

D. Agree

E. Strongly agree

**Open-ended Questions (Post-session Only)**

**Instructions**

You may answer using short sentences, keywords, or phrases.

Full sentences are not required.

You may write:

- keywords (e.g., trust, misunderstanding, uncertainty)
- short phrases (e.g., patients trust AI more)
- brief examples if helpful

Please focus on your ideas rather than grammar.

There is no minimum or maximum length for responses.

**Q1**

**What challenges may healthcare professionals face when patients rely on AI-generated explanations?**

You may think about:

- patient trust in AI
- misunderstanding
- communication difficulties
- uncertainty

(Short answers or keywords are acceptable.)

**Q2**

**How would you respond as a healthcare professional in this situation?**

You may include:

- what you would say to the patient
- how you explain medical information
- how you address misunderstanding
- how you build trust

(Short answers are acceptable.)

**Q3**

**What do you think are the implications of AI-mediated communication for healthcare practice?**

You may think about:

- interpretive authority
- professional responsibility
- uncertainty communication
- patient understanding
- communication challenges

(Keywords or short phrases are acceptable.)
